# Supplementary material
Source: ML conference proceedings conference paper supplement (https://www.ecva.net/papers/eccv_2022/papers_ECCV/html/136670659_ECCV_2022_paper.php)
Supplement: Supplementary file 2 [file 136670659-supp.zip]

Archive with 11 entries (10 files):
- UserStudy/
- UserStudy/.DS_Store
- UserStudy/README.ME
- UserStudy/GT.mp4
- UserStudy/model.mp4
- UserStudy/random_per_frame.mp4
- UserStudy/random_per_snippet.mp4
- UserStudy/raw_B.mp4
- UserStudy/random_biased.mp4
- UserStudy/raw_A.mp4
- 0859-supp.pdf
