# Supplementary material
Source: ML conference proceedings conference paper supplement (https://www.ecva.net/papers/eccv_2022/papers_ECCV/html/136670659_ECCV_2022_paper.php)
Supplement: Supplementary file 2 [file 136670659-supp.zip › UserStudy/README.ME]

# USER STUDY DATA

We attach some of the data used for section 4.5 in the paper, such that the reader can be familiar with the task.
Under this folder, you'll find the next videos:

- Raw_{A,B}.mp4: Raw shots before the editing process.
- GT.mp4: Final edit made by a professional using the raw video A and B.
- random_per_frame.mp4: Edit made by cutting from shot A to B and viceversa, every frame with a uniform probability.
- random_per_frame.mp4: Edit made by cutting from shot A to B and viceversa, every 16-frame snippet with a uniform probability.
- random_biased.mp4: Edit made by cutting the same number of times at GT, at random places.
- model.mp4: Edit made by cutting the same number of time as GT.mp4, but at the top-k places scored by our AV-model trained on MovieCuts.

## Further details

- The raw shots A and B, had to be previously aligned before making the final editings. 
- The GT.mp4 was taken from EditStock.com and made by a professional editor as part of a scene of a movie.
- The automated methods where asked to made edits alternating between shots A and B to make a final sequence.
- Despite not being trained for the task, and just using the knowledge from MovieCuts, model.mp4 was the best-looking automated edit according to AMT turkers.
- Similar to this example, we performed 11 other automated edits in which we consistently outperform the other automated methods. 
